# Supplementary material
Source: PubMed Central journal article supplement (PMC489998)

**A**

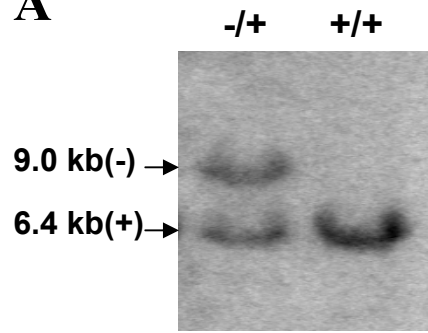

**B**

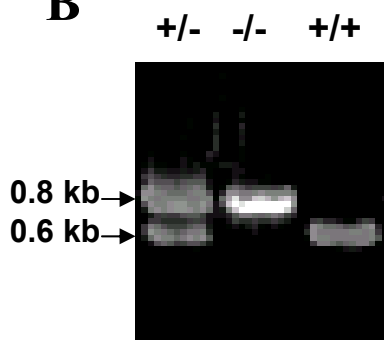

**C**

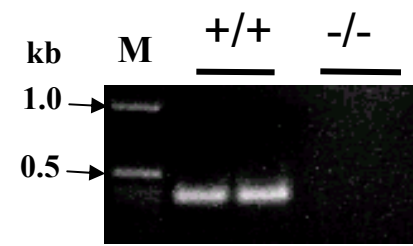

Supplement: pnas_101_29_10703__2.pdf [file pnas_101_29_10703__2.pdf]

**A**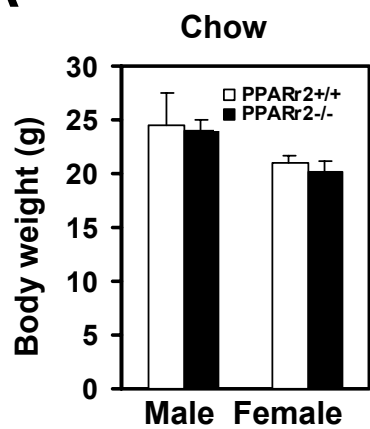**B**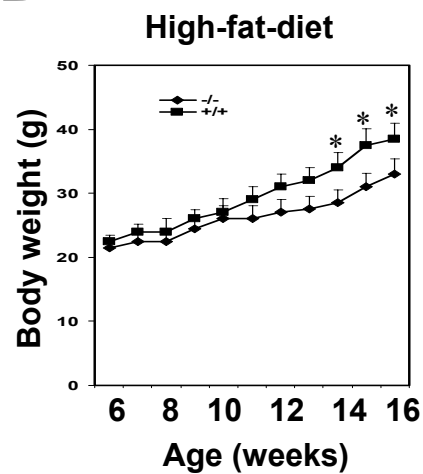**C**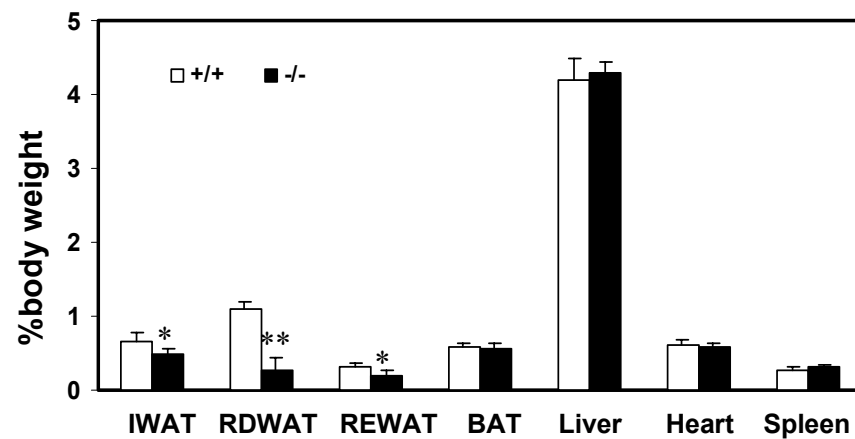

Supplement: pnas_101_29_10703__3.pdf [file pnas_101_29_10703__3.pdf]

**A**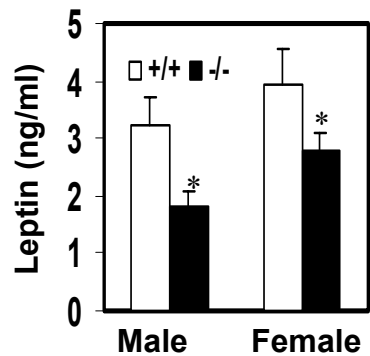**B**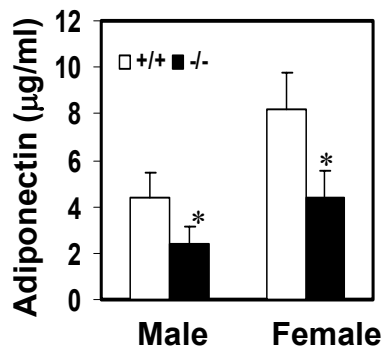**C**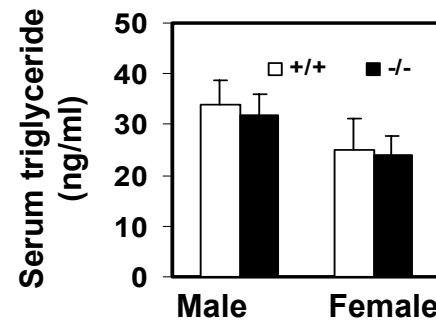**D**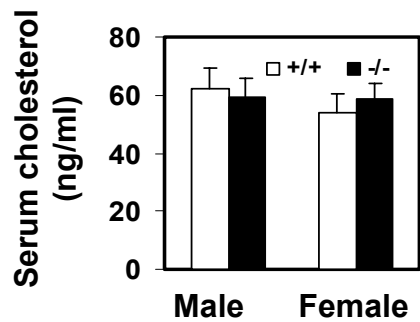**E**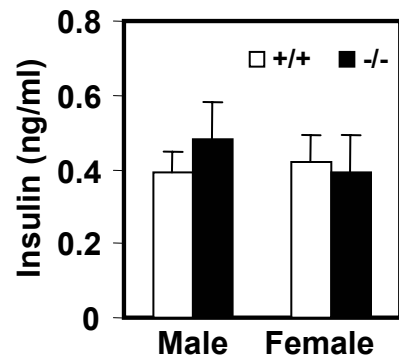**F**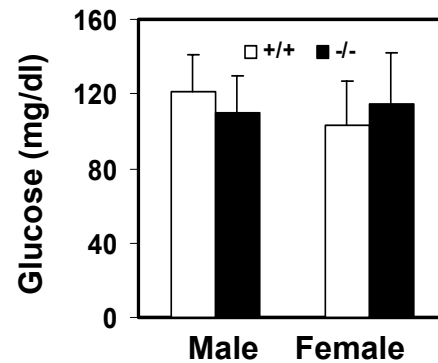

Supplement: pnas_101_29_10703__4.pdf [file pnas_101_29_10703__4.pdf]
